# Supplementary material for: Structural regulation of three Fe–Co cyanometallate complexes: reactant ratio issue
Source: Royal Society of Chemistry journal article supplement (doi:10.1039/d4ce01049c), 2024-12-05
Supplement: d4ce01049c1.pdf [file d4ce01049c1.pdf]

*Supporting Information*

**Structural regulation of three Fe-Co cyanometallate complexes: reactant ratio issue**

Qiuyu Li,<sup>a†</sup> Qiuyue Cao,<sup>a†</sup> Jing Xi,<sup>b</sup> Ziyi Zhang,<sup>a</sup> Binling Yao,<sup>\*a</sup> Dong Shao,<sup>c</sup> Yi-Fei Deng,<sup>b</sup> and Yuan-Zhu Zhang<sup>\*b</sup>

<sup>a</sup> Hubei Key Laboratory of Pollutant Analysis & Reuse Technology, College of Chemistry and Chemical Engineering, Hubei Normal University, Huangshi 435002 (P. R. China), Email: [yaobinling@hbnu.edu.cn](mailto:yaobinling@hbnu.edu.cn).

<sup>b</sup> Department of Chemistry, Southern University of Science and Technology (SUSTech), Shenzhen, 518055, China, Email: [zhangyz@sustech.edu.cn](mailto:zhangyz@sustech.edu.cn).

<sup>c</sup> Hubei Key Laboratory of Processing and Application of Catalytic Materials, College of Chemistry and Chemical Engineering, Huanggang Normal University, Huanggang 438000, P. R. China.

**Table S1.** Selected Bond lengths [Å] and angles [deg] for **1**.

|                   |           |                   |           |
|-------------------|-----------|-------------------|-----------|
| Co(1)-N(10)       | 2.187(3)  | Fe(2)-C(18)       | 1.923(4)  |
| Co(1)-N(11)       | 2.120(3)  | Fe(2)-C(22)       | 1.905(4)  |
| Co(1)-N(15)       | 2.143(3)  | Fe(2)-C(36)       | 1.914(5)  |
| Co(1)-N(13)       | 2.162(3)  | Fe(1)-N(3)        | 1.986(4)  |
| Co(1)-N(9)        | 2.084(4)  | Fe(1)-N(5)        | 1.971(4)  |
| Co(1)-N(17)       | 2.045(3)  | Fe(1)-N(1)        | 1.973(4)  |
| Fe(2)-N(20)       | 1.959(3)  | Fe(1)-C(16)       | 1.904(4)  |
| Fe(2)-N(24)       | 1.983(4)  | Fe(1)-C(32)       | 1.935(4)  |
| Fe(2)-N(22)       | 1.983(3)  | Fe(1)-C(27)       | 1.915(6)  |
|                   |           |                   |           |
| N(11)-Co(1)-N(10) | 73.48(12) | C(22)-Fe(2)-C(18) | 86.74(16) |
| N(11)-Co(1)-N(15) | 82.19(12) | C(22)-Fe(2)-C(36) | 86.80(18) |
| N(11)-Co(1)-N(13) | 83.35(12) | C(36)-Fe(2)-N(20) | 92.59(18) |
| N(15)-Co(1)-N(13) | 81.87(13) | C(36)-Fe(2)-N(22) | 91.77(18) |
| N(9)-Co(1)-N(10)  | 80.58(13) | C(36)-Fe(2)-C(18) | 87.8(2)   |
| N(9)-Co(1)-N(13)  | 84.74(13) | N(5)-Fe(1)-N(3)   | 87.02(16) |
| N(17)-Co(1)-N(10) | 91.14(12) | N(5)-Fe(1)-N(1)   | 89.15(15) |
| N(17)-Co(1)-N(15) | 88.35(13) | N(1)-Fe(1)-N(3)   | 89.21(17) |
| N(17)-Co(1)-N(9)  | 90.97(14) | C(16)-Fe(1)-N(5)  | 88.38(16) |
| N(20)-Fe(2)-N(24) | 88.72(15) | C(16)-Fe(1)-C(32) | 89.41(17) |
| N(20)-Fe(2)-N(22) | 88.50(14) | C(16)-Fe(1)-C(27) | 84.93(19) |
| N(22)-Fe(2)-N(24) | 88.98(15) | C(32)-Fe(1)-N(3)  | 88.86(17) |
| C(18)-Fe(2)-N(24) | 90.88(17) | C(32)-Fe(1)-N(1)  | 93.46(16) |
| C(18)-Fe(2)-N(22) | 93.21(16) | C(27)-Fe(1)-N(5)  | 95.82(18) |
| C(22)-Fe(2)-N(20) | 91.56(15) | C(27)-Fe(1)-N(1)  | 89.87(19) |
| C(22)-Fe(2)-N(24) | 92.45(16) | C(27)-Fe(1)-C(32) | 88.34(19) |

**Table S2.** Selected Bond lengths [Å] and angles [deg] for **2**.

|                   |            |                   |            |
|-------------------|------------|-------------------|------------|
| Co(1)-N(1)        | 2.1456(18) | Fe(1)-N(12)       | 1.9704(17) |
| Co(1)-N(8)        | 2.0545(18) | Fe(1)-N(14)       | 1.9617(17) |
| Co(1)-N(16)A      | 2.1071(18) | Fe(1)-N(9)        | 1.9936(18) |
| Co(1)-N(5)        | 2.1402(17) | Fe(1)-C(16)       | 1.916(2)   |
| Co(1)-N(4)        | 2.1366(18) | Fe(1)-C(26)       | 1.919(2)   |
| Co(1)-N(7)        | 2.1874(18) | Fe(1)-C(27)       | 1.913(2)   |
|                   |            |                   |            |
| N(1)-Co(1)-N(7)   | 148.27(7)  | N(12)-Fe(1)-N(9)  | 88.15(7)   |
| N(8)-Co(1)-N(1)   | 109.22(7)  | N(14)-Fe(1)-N(12) | 88.99(7)   |
| N(8)-Co(1)-N(16)A | 89.10(7)   | N(14)-Fe(1)-N(9)  | 88.58(7)   |
| N(8)-Co(1)-N(5)   | 164.62(7)  | C(16)-Fe(1)-N(12) | 89.68(8)   |
| N(8)-Co(1)-N(4)   | 91.74(7)   | C(16)-Fe(1)-N(14) | 92.21(8)   |
| N(8)-Co(1)-N(7)   | 97.85(7)   | C(16)-Fe(1)-N(9)  | 177.68(8)  |
| N(16)A-Co(1)-N(1) | 85.17(7)   | C(16)-Fe(1)-C(26) | 88.69(9)   |
| N(16)A-Co(1)-N(5) | 101.05(7)  | C(26)-Fe(1)-N(12) | 177.16(8)  |

|                   |           |                   |           |
|-------------------|-----------|-------------------|-----------|
| N(16)A-Co(1)-N(4) | 169.63(7) | C(26)-Fe(1)-N(14) | 93.40(8)  |
| N(16)A-Co(1)-N(7) | 78.88(7)  | C(26)-Fe(1)-N(9)  | 93.44(8)  |
| N(5)-Co(1)-N(1)   | 83.35(7)  | C(27)-Fe(1)-N(12) | 93.17(8)  |
| N(5)-Co(1)-N(7)   | 73.18(7)  | C(27)-Fe(1)-N(14) | 177.43(8) |
| N(4)-Co(1)-N(1)   | 84.80(7)  | C(27)-Fe(1)-N(9)  | 90.10(8)  |
| N(4)-Co(1)-N(5)   | 80.36(7)  | C(27)-Fe(1)-C(16) | 89.21(9)  |
| N(4)-Co(1)-N(7)   | 111.21(7) | C(27)-Fe(1)-C(26) | 84.48(9)  |

Symmetry transformations used to generate equivalent atoms: A  $-x+1,-y+1,-z+1$

**Table S3.** Selected Bond lengths [Å] and angles [deg] for **3**.

|                  |          |                   |          |
|------------------|----------|-------------------|----------|
| Co(1)-N(5)       | 2.150(6) | Fe(1)-N(16)       | 1.954(6) |
| Co(1)-N(1)       | 2.166(6) | Fe(1)-N(13)       | 1.969(6) |
| Co(1)-N(3)       | 2.127(5) | Fe(1)-N(11)       | 1.977(5) |
| Co(1)-N(8)       | 2.054(5) | Fe(1)-C(17)       | 1.922(8) |
| Co(1)-N(7)       | 2.114(5) | Fe(1)-C(16)       | 1.901(6) |
| Co(1)-N(9)A      | 2.099(7) | Fe(1)-C(18)       | 1.920(6) |
| N(5)-Co(1)-N(1)  | 110.7(2) | N(16)-Fe(1)-N(13) | 88.4(3)  |
| N(3)-Co(1)-N(5)  | 80.7(2)  | N(16)-Fe(1)-N(11) | 88.8(2)  |
| N(3)-Co(1)-N(1)  | 73.2(2)  | N(13)-Fe(1)-N(11) | 88.2(2)  |
| N(8)-Co(1)-N(5)  | 87.8(2)  | C(17)-Fe(1)-N(16) | 179.1(2) |
| N(8)-Co(1)-N(1)  | 89.0(2)  | C(17)-Fe(1)-N(13) | 91.1(3)  |
| N(8)-Co(1)-N(3)  | 153.5(2) | C(17)-Fe(1)-N(11) | 91.9(3)  |
| N(8)-Co(1)-N(7)  | 116.0(2) | C(16)-Fe(1)-N(16) | 91.4(3)  |
| N(8)-Co(1)-N(9)A | 95.4(2)  | C(16)-Fe(1)-N(13) | 92.7(2)  |
| N(7)-Co(1)-N(5)  | 83.2(2)  | C(16)-Fe(1)-N(11) | 179.1(3) |
| N(7)-Co(1)-N(1)  | 152.4(2) | C(16)-Fe(1)-C(17) | 87.9(3)  |
| N(7)-Co(1)-N(3)  | 86.4(2)  | C(16)-Fe(1)-C(18) | 87.3(3)  |
| N(9)A-Co(1)-N(5) | 168.5(2) | C(18)-Fe(1)-N(16) | 92.5(3)  |
| N(9)A-Co(1)-N(1) | 80.4(2)  | C(18)-Fe(1)-N(13) | 179.1(3) |
| N(9)A-Co(1)-N(3) | 100.6(2) | C(18)-Fe(1)-N(11) | 91.8(2)  |
| N(9)A-Co(1)-N(7) | 85.5(2)  | C(18)-Fe(1)-C(17) | 88.0(3)  |

Symmetry transformations used to generate equivalent atoms: A  $x,-y+3/2,z-1/2$  B  $x,-y+3/2,z+1/2$

**Table S4.** Continuous Shape Measure (CSM) parameters for **1-3**.

| Compound,<br>Metal<br>center | CSM parameters                       |                                       |                         |                                   |                                                  | Determined<br>coordination<br>geometry |
|------------------------------|--------------------------------------|---------------------------------------|-------------------------|-----------------------------------|--------------------------------------------------|----------------------------------------|
|                              | Six- coordinated coordination sphere |                                       |                         |                                   |                                                  |                                        |
|                              | Hexagon<br>( $D_{6h}$ )              | Pentagonal<br>pyramid<br>( $C_{5v}$ ) | Octahedron<br>( $O_h$ ) | Trigonal<br>prism<br>( $D_{3h}$ ) | Johnson<br>pentagonal<br>pyramid<br>( $C_{5v}$ ) |                                        |
| <b>1</b> _Co                 | 32.317                               | 19.024                                | <b>4.709</b>            | 4.743                             | 23.264                                           | Octahedron<br>( $O_h$ )                |
| <b>2</b> _Co                 | 29.906                               | 18.706                                | <b>3.393</b>            | 6.775                             | 22.478                                           |                                        |
| <b>3</b> _Co                 | 32.629                               | 18.915                                | <b>3.908</b>            | 5.864                             | 22.723                                           |                                        |

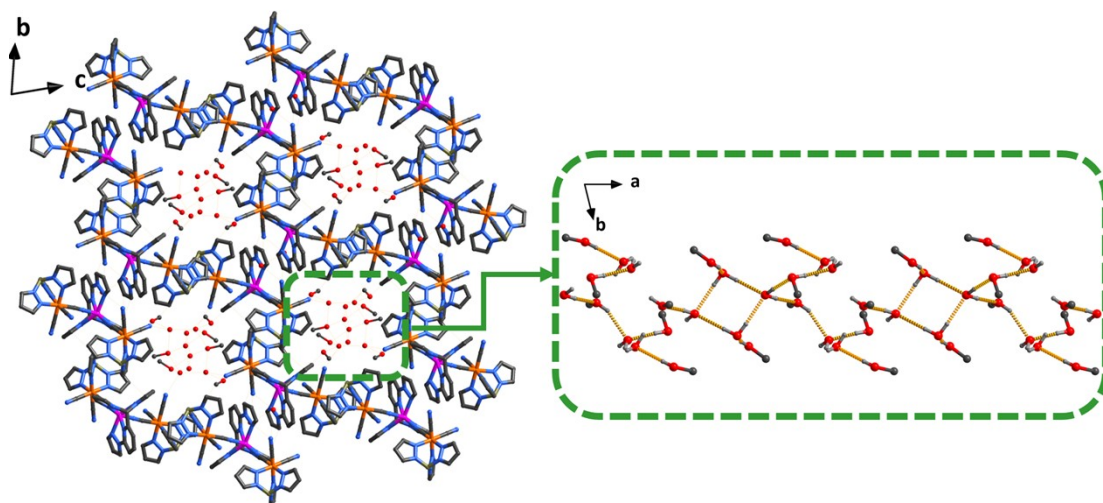

**Figure S1.** The packing diagram of **1**. Colour codes: Co, pink; Fe, orange; B, yellow; N, blue; O, red; C, grey. All hydrogen atoms, counterions and partial lattice solvents are omitted for clarity. Insert is the hydrogen bond network formed through MeOH and H<sub>2</sub>O.

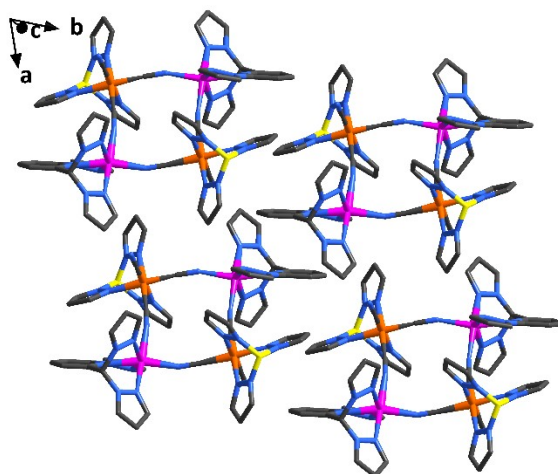

**Figure S2.** The packing diagram of **2**. Colour codes: Co, pink; Fe, orange; B, yellow; N, blue; O, red; C, grey. All hydrogen atoms, lattice solvents and counterions are omitted for clarity.

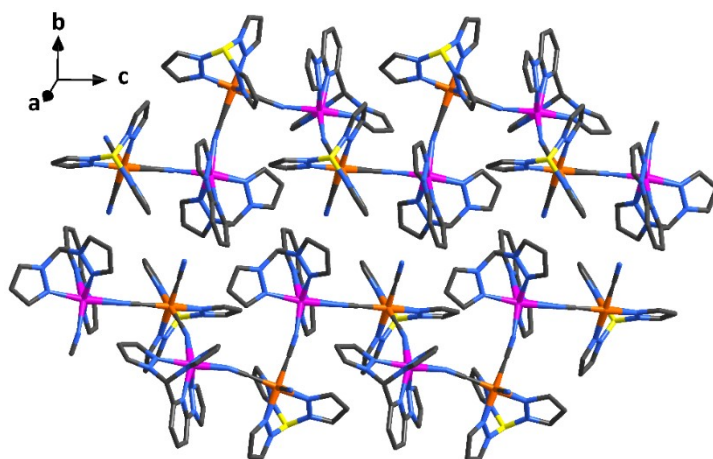

**Figure S3.** The packing diagram of **2**. Colour codes: Co, pink; Fe, orange; B, yellow; N, blue; O, red; C, grey. All the fluorine and hydrogen atoms, lattice solvents and counterions are omitted for clarity.

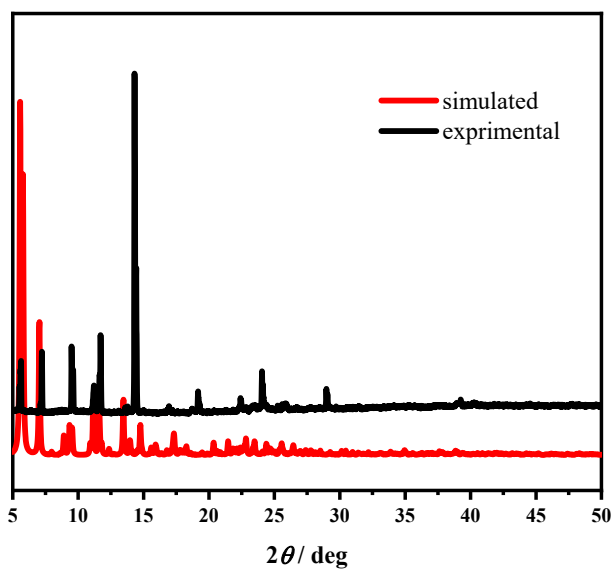

**Figure S4.** The powder X-ray diffraction for **1**. The red line is calculated from the single crystal data.

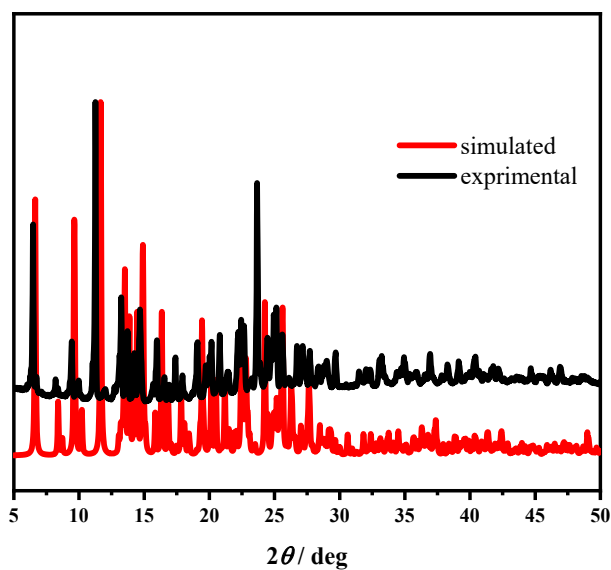

**Figure S5.** The powder X-ray diffraction for **2**. The red line is calculated from the single crystal data.

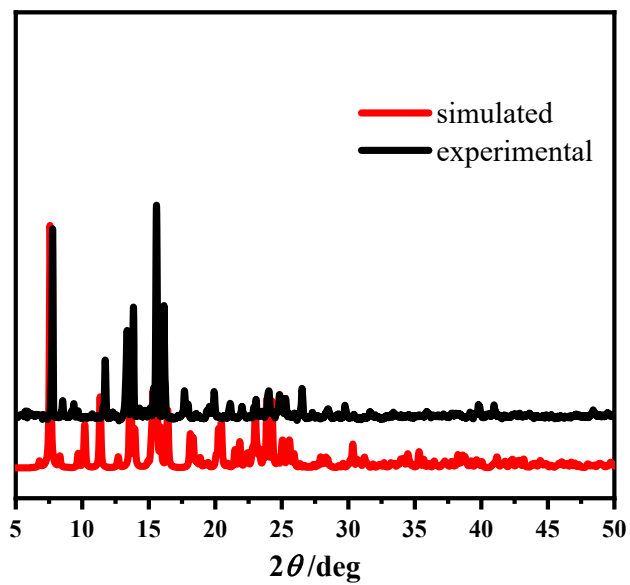

Figure S6. The powder X-ray diffraction for **3**. The red line is calculated from the single crystal data.

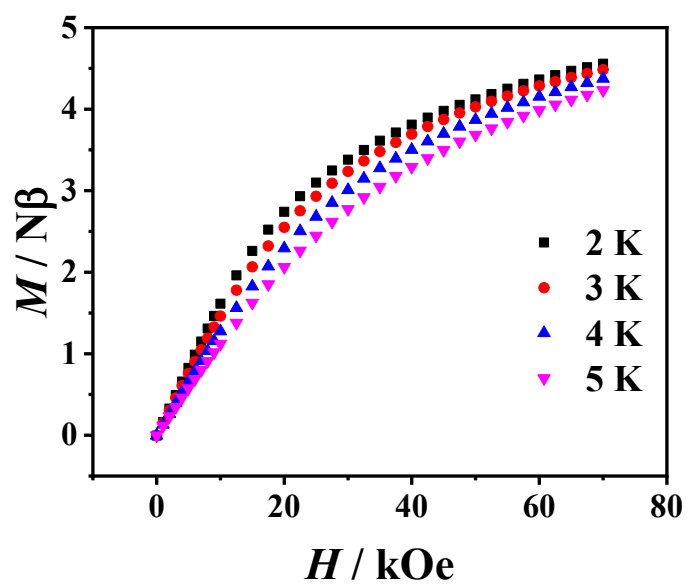

Figure S7. Field dependence of the magnetization for **1** between 2 and 5 K. Solid lines are guides for eye.

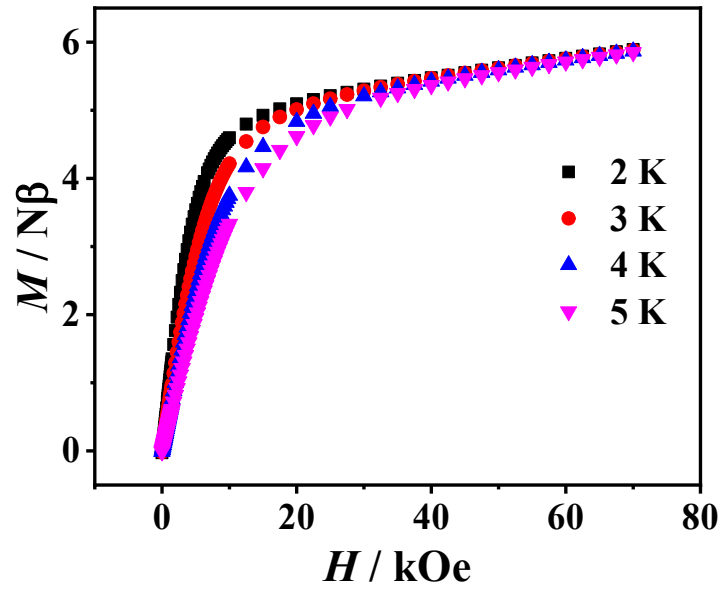

Figure S8. Field dependence of the magnetization for 2 between 2 and 5 K. Solid lines are guides for eye.

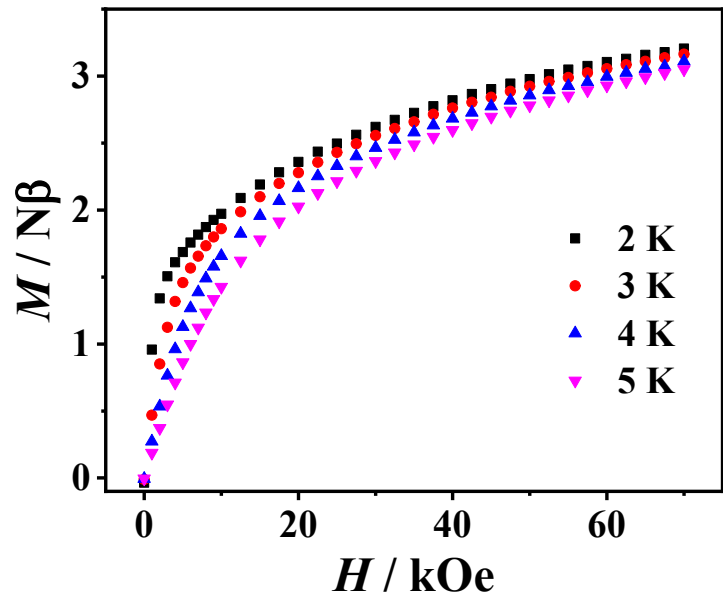

Figure S9. Field dependence of the magnetization for 3 between 2 and 5 K. Solid lines are guides for eye.



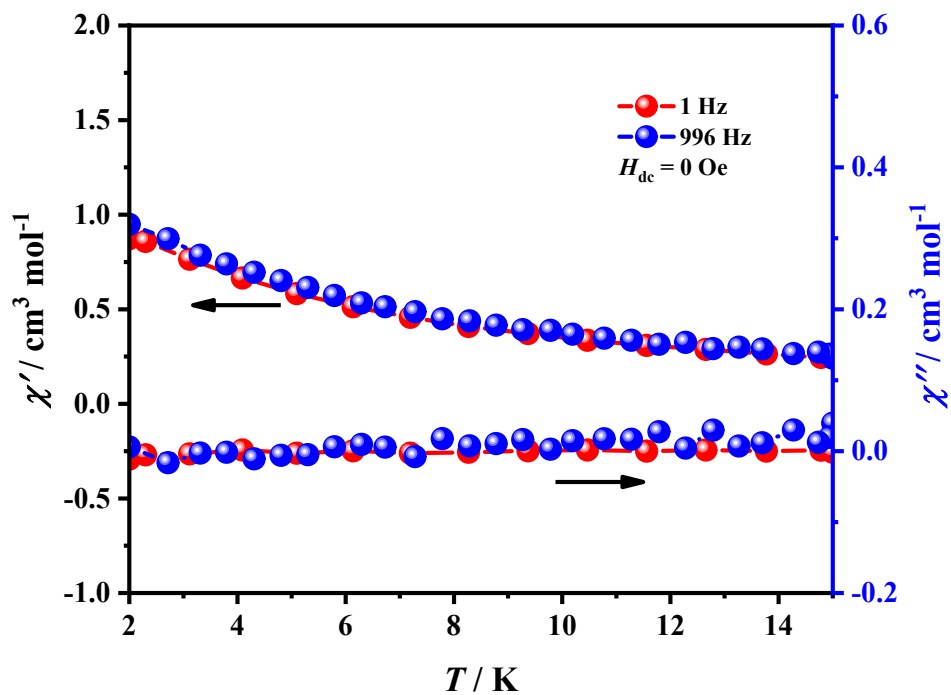

**Figure S10.** Temperature dependence of the in-phase ( $\chi'$ ) and out-of-phase ( $\chi''$ ) ac susceptibility for 1 at zero dc field. The lines are guides to the eyes.

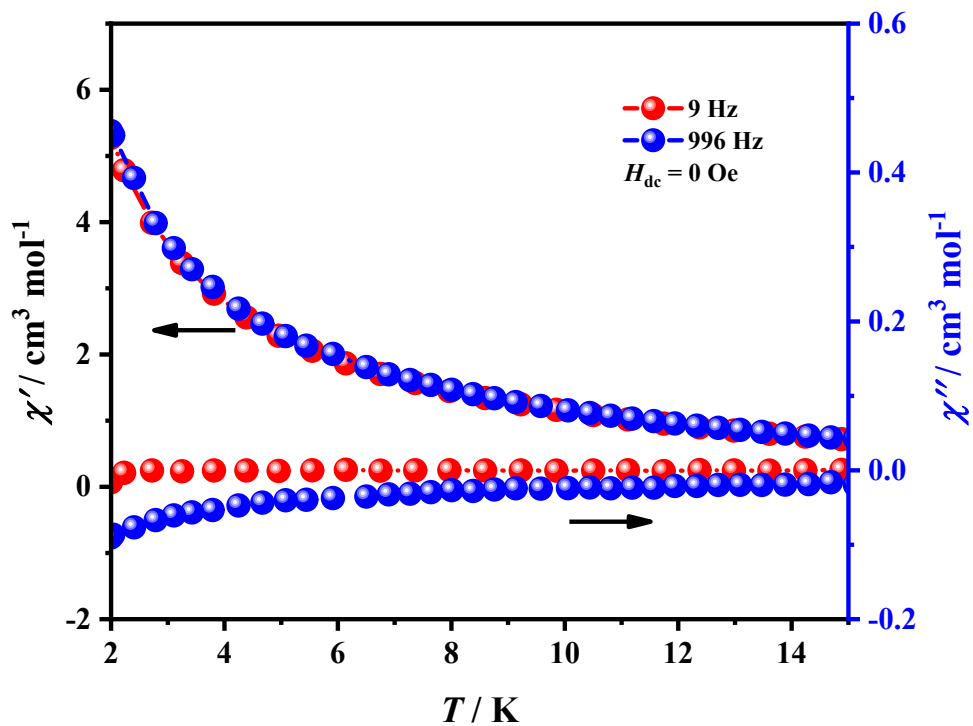

**Figure S11.** Temperature dependence of the in-phase ( $\chi'$ ) and out-of-phase ( $\chi''$ ) ac susceptibility for 2 at zero dc field. The lines are guides to the eyes.

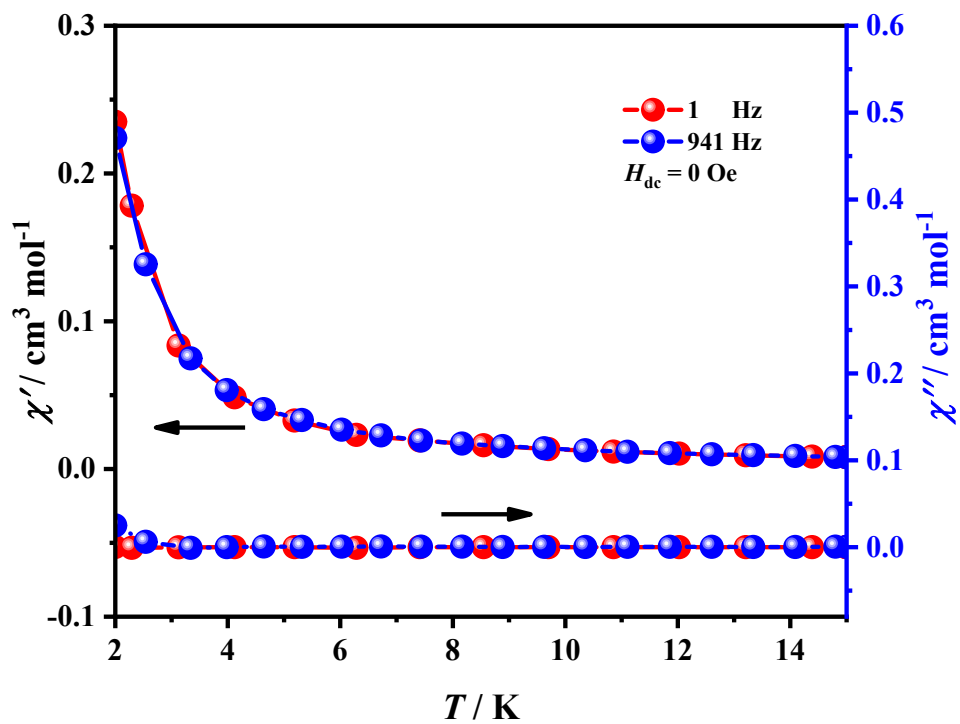

**Figure S12.** Temperature dependence of the in-phase ( $\chi'$ ) and out-of-phase ( $\chi''$ ) ac susceptibility for 3 at zero dc field. The lines are guides to the eyes.
